# Supplementary material
Source: Springer Nature journal article supplement (https://www.springermedizin.de/resource/supplementary/12955_2009_646_MOESM2_ESM.pdf/9560988)

**TREATMENT**

- Oral medication
  - Insulin tablets
  - Insulin injections
  - Insulin and oral combination

Self management:

- Exercise
- Diet
- Glucose Monitoring

Combined:

- Diet plus oral hypoglycaemic agents
- Diet plus insulin
- Diet, insulin and Pills

**TYPE 2 DIABETES**

**INDIVIDUAL CHARACTERISTICS**

- Age
- Gender
- Ethnicity
- Culture

**SYMPTOMS**

- Drowsiness ●
- Tiredness ●■
- Weakness (●)
- Headaches
- Dizziness
- Mouth problems
- Pain ●■◆▲■
- Body aches ●
- Physical discomfort ●■◆▲▲

**SIGNS**

- Excessive thirst
- Excessive /frequent urinating
- Incontinence ●
- Sweating
- Hot
- Hunger
- Lack of energy ●■
- High blood sugar
- Overweight

**COMPLICATIONS AND COMORBIDITIES**

- Peripheral neuropathy ◆▲■◆■
- Strokes
- Kidney problems
- Cardiovascular
  - Hypertension
  - Hypercholesterolemia
- Impotence ●
- Retinopathy ●▲◆
- Hypoglycemia ●■

**EXTERNAL FACTORS**

- Stressful events
- Health care providers
- Provision of information
- Family environment/stress
- Economic issues
- Environment
- Diagnosis
- Coping

**Key:**

- = 15D
- = EQ-5D
- ◆ = HU12
- ▲ = HU13
- = SF-6D

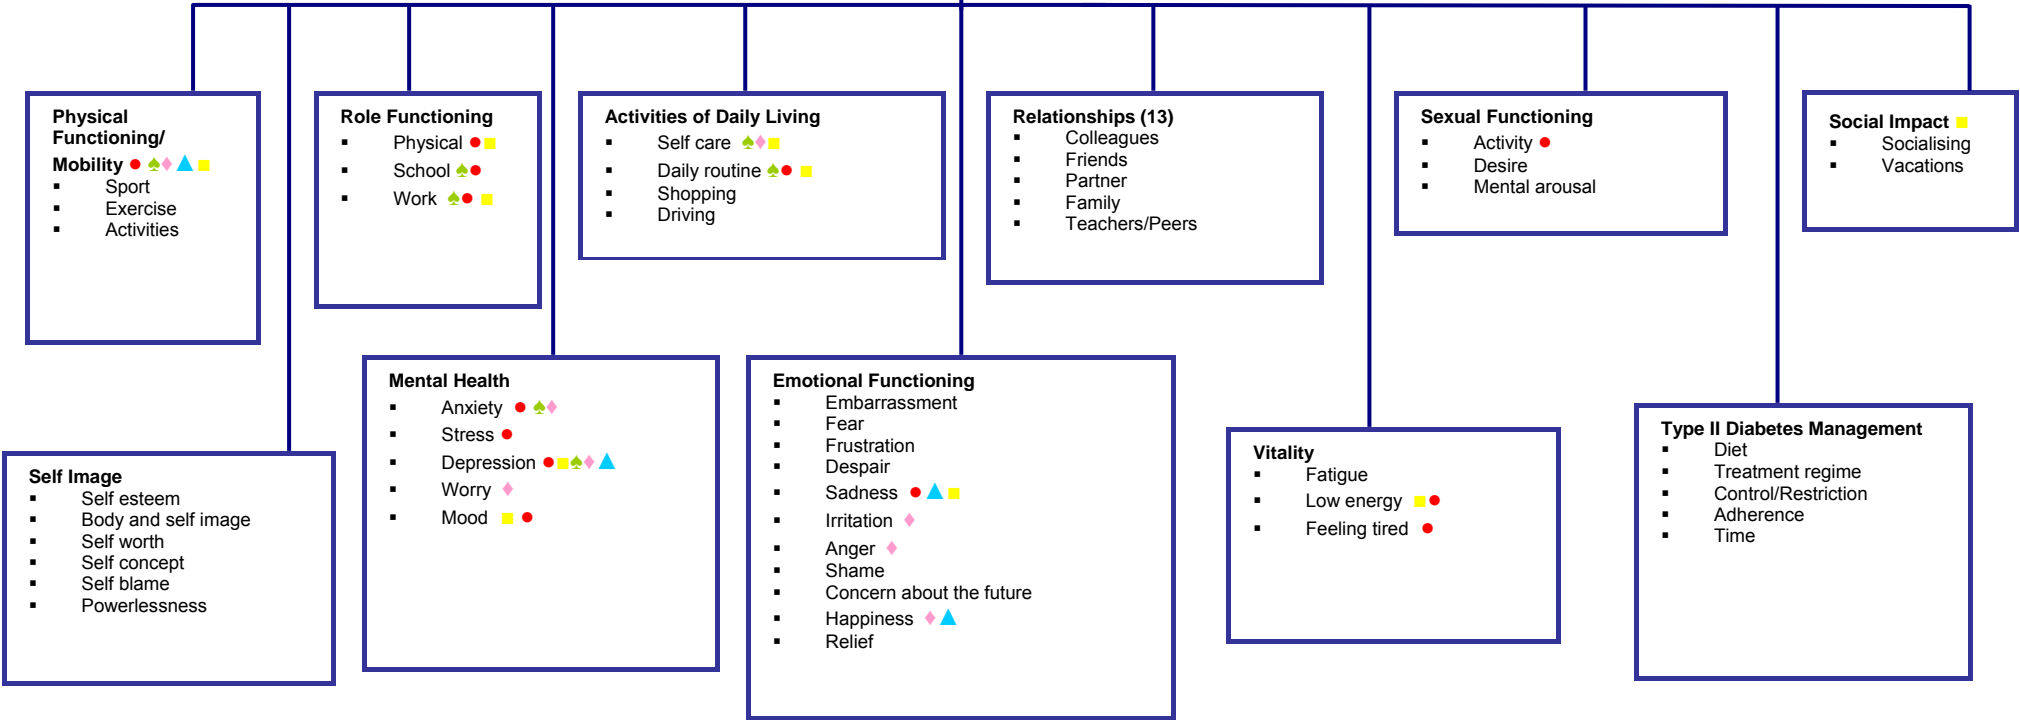

Supplement: MOESM2 [file 9560988]
